# Supplementary material for: Sounds of COVID-19: exploring realistic performance of audio-based digital testing
Source: Springer Nature journal article supplement (doi:10.1038/s41746-021-00553-x), 2022-01-28
Supplement: 41746_2021_553_MOESM1_ESM.pdf [file 41746_2021_553_MOESM1_ESM.pdf]

## Supplementary Information

**Supplementary Table 1. Demographics distribution of the training and balanced testing set.**

|        | Positive   |            |           | Negative   |            |           |
|--------|------------|------------|-----------|------------|------------|-----------|
|        | Training   | Validation | Testing   | Training   | Validation | Testing   |
| Male   | 192(54.9%) | 29(58.0%)  | 58(58.0%) | 188(53.7%) | 31(62.0%)  | 52(52.0%) |
| Female | 154(44.0%) | 20(40.0%)  | 42(42.0%) | 159(45.4%) | 19(38.0%)  | 46(46.0%) |
| 16-29  | 92(26.3%)  | 10(20.0%)  | 22(22.0%) | 73(20.9%)  | 16(32.0%)  | 21(21.0%) |
| 30-39  | 94(26.9%)  | 16(32.0%)  | 33(33.0%) | 97(27.7%)  | 13(26.0%)  | 33(33.0%) |
| 40-49  | 86(24.6%)  | 13(26.0%)  | 23(23.0%) | 86(24.6%)  | 10(20.0%)  | 24(24.0%) |
| 50-59  | 39(11.1%)  | 5(10.0%)   | 13(13.0%) | 50(14.3%)  | 4(8.0%)    | 10(10.0%) |
| 60-69  | 17(4.9%)   | 1(2.0%)    | 3(3.0%)   | 18(5.1%)   | 4(8.0%)    | 4(4.0%)   |
| 70-    | 6(1.7%)    | 2(4.0%)    | 1(1.0%)   | 7(2.0%)    | 1(2.0%)    | 2(2.0%)   |

A small proportion (5%) of the participants in each set preferred not to answer about their age or gender.

**Supplementary Table 2. Performance of subgroups based on the model trained with Random Splits.**

| Subgroup       | # Pos./Neg.       | AUC(95% CI)     | Sensitivity(95% CI) | Specificity(95% CI) |
|----------------|-------------------|-----------------|---------------------|---------------------|
| <b>Total</b>   | 143(161)/139(158) | 0.80(0.75-0.84) | 0.71(0.63-0.77)     | 0.74(0.68-0.81)     |
| <b>Gender</b>  |                   |                 |                     |                     |
| Male           | 76(85)/77(85)     | 0.81(0.74-0.87) | 0.72(0.62-0.81)     | 0.75(0.66-0.84)     |
| Female         | 65(74)/62(73)     | 0.79(0.71-0.86) | 0.70(0.61-0.81)     | 0.73(0.62-0.83)     |
| <b>Age</b>     |                   |                 |                     |                     |
| 16-39          | 69(79)/59(63)     | 0.82(0.75-0.89) | 0.73(0.63-0.83)     | 0.76(0.65-0.87)     |
| 40-59          | 59(65)/57(70)     | 0.76(0.68-0.84) | 0.66(0.54-0.77)     | 0.70(0.59-0.81)     |
| 60-            | 10(12)/15(16)     | 0.86(0.71-0.98) | 0.83(0.58-1.0)      | 0.88(0.69-1.0)      |
| <b>Overlap</b> |                   |                 |                     |                     |
| Seen           | 50(62)/59(76)     | 0.90(0.85-0.95) | 0.84(0.75-0.92)     | 0.78(0.68-0.87)     |
| Unseen         | 93(99)/80(82)     | 0.70(0.62-0.77) | 0.63(0.53-0.72)     | 0.71(0.60-0.81)     |

# denotes the number of unique positive/negative participants and in brackets are the number of samples for corresponding groups (some participants provided multiple samples). The same for Supplementary Tables 3-6.

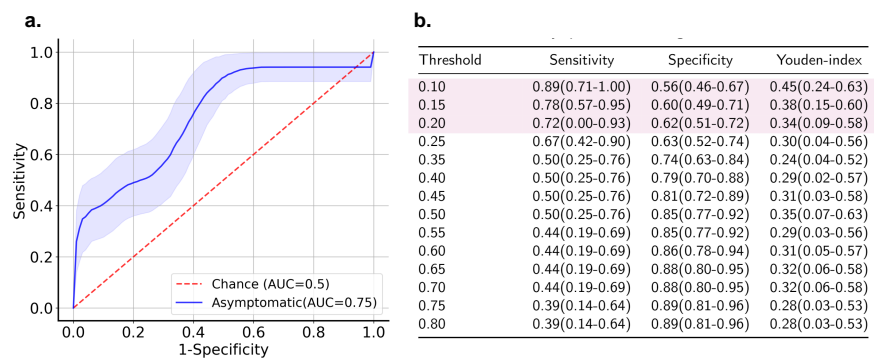

**Supplementary Figure 1. Model performance for asymptomatic screening.** **a**, Receiver-operating characteristic curve for the binary classification task of diagnosing COVID-19. **b**, Sensitivity and specificity with 95% CIs under different thresholds. The default value is 0.50.

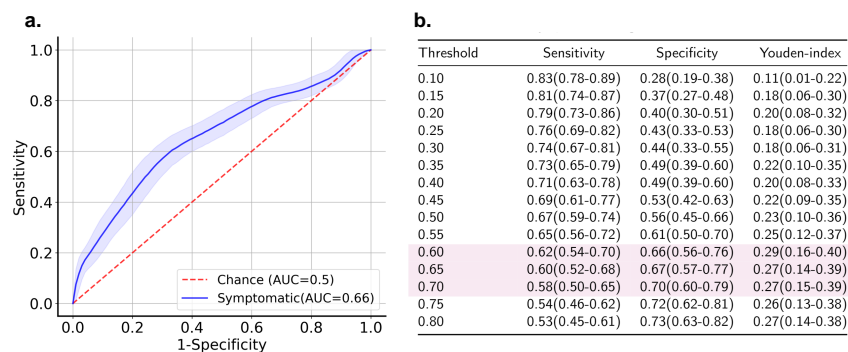

**Supplementary Figure 2. Model performance for symptomatic diagnosis.** **a**, Receiver-operating characteristic curve for the binary classification task of diagnosing COVID-19. **b**, Sensitivity and specificity with 95% CIs under different thresholds. The default value is 0.50.

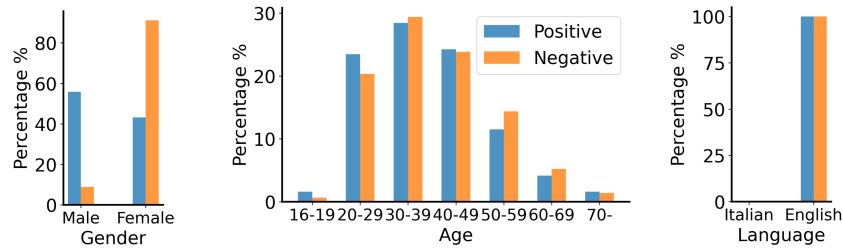

**Supplementary Figure 3. Overall Demographic distribution for gender bias evaluation.**

**Supplementary Table 3. Performance of subgroups based on the model trained with Gender Bias.**

| Subgroup      | # Pos./Neg.       | AUC(95% CI)     | Sensitivity(95% CI) | Specificity(95% CI) |
|---------------|-------------------|-----------------|---------------------|---------------------|
| <b>Total</b>  | 100(162)/100(187) | 0.75(0.70-0.80) | 0.46(0.38-0.54)     | 0.90(0.86-0.95)     |
| <b>Gender</b> |                   |                 |                     |                     |
| Male          | 58(85)/9(18)      | 0.62(0.49-0.74) | 0.66(0.56-0.76)     | 0.61(0.36-0.83)     |
| Female        | 42(77)/91(169)    | 0.66(0.58-0.74) | 0.23(0.14-0.33)     | 0.93(0.90-0.97)     |
| <b>Age</b>    |                   |                 |                     |                     |
| 16-39         | 55(81)/53(83)     | 0.69(0.61-0.76) | 0.41(0.30-0.52)     | 0.84(0.76-0.92)     |
| 40-59         | 36(68)/38(86)     | 0.79(0.71-0.85) | 0.56(0.44-0.67)     | 0.94(0.89-0.99)     |
| 60-           | 4(8)/7(16)        | 0.96(0.86-1.00) | 0.25(0.00-0.62)     | 1.00(1.00-1.00)     |

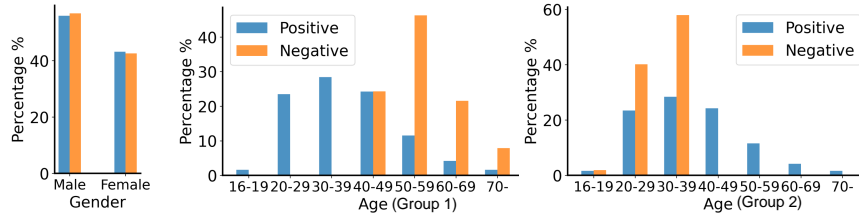

**Supplementary Figure 4. Overall Demographic distribution for age bias evaluation.**

**Supplementary Table 4. Performance of subgroups based on the model trained with Age Bias (Group 1).**

| Subgroup      | # Pos./Neg.       | AUC(95% CI)     | Sensitivity(95% CI) | Specificity(95% CI) |
|---------------|-------------------|-----------------|---------------------|---------------------|
| <b>Total</b>  | 100(162)/100(162) | 0.80(0.74-0.84) | 0.71(0.63-0.78)     | 0.73(0.66-0.79)     |
| <b>Gender</b> |                   |                 |                     |                     |
| Male          | 58(85)/58(97)     | 0.81(0.75-0.87) | 0.71(0.61-0.80)     | 0.77(0.68-0.85)     |
| Female        | 42(77)/42(65)     | 0.78(0.71-0.85) | 0.71(0.61-0.81)     | 0.66(0.55-0.78)     |
| <b>Age</b>    |                   |                 |                     |                     |
| 16-39         | 55(81)/0(0)       | -               | 0.75(0.65-0.84)     | -                   |
| 40-49         | 23(41)/25(31)     | 0.70(0.58-0.81) | 0.73(0.59-0.86)     | 0.61(0.44-0.78)     |
| 50-59         | 13(27)/47(74)     | 0.74(0.61-0.86) | 0.67(0.47-0.84)     | 0.73(0.63-0.83)     |
| 60-           | 4(8)/28(57)       | 0.62(0.45-0.79) | 0.25(0.00-0.60)     | 0.79(0.68-0.89)     |

**Supplementary Table 5. Performance of subgroups based on the model trained with Age Bias (Group 2).**

| Subgroup      | # Pos./Neg.       | AUC(95% CI)     | Sensitivity(95% CI) | Specificity(95% CI) |
|---------------|-------------------|-----------------|---------------------|---------------------|
| <b>Total</b>  | 100(162)/100(121) | 0.65(0.58-0.71) | 0.53(0.45-0.61)     | 0.69(0.61-0.78)     |
| <b>Gender</b> |                   |                 |                     |                     |
| Male          | 58(85)/57(65)     | 0.64(0.55-0.72) | 0.48(0.38-0.59)     | 0.69(0.58-0.80)     |
| Female        | 42(77)/43(56)     | 0.66(0.57-0.75) | 0.58(0.48-0.69)     | 0.70(0.57-0.82)     |
| <b>Age</b>    |                   |                 |                     |                     |
| 16-39         | 55(81)/100(121)   | 0.60(0.52-0.68) | 0.44(0.34-0.55)     | 0.69(0.60-0.77)     |
| 40-           | 40(76)/0(0)       | -               | 0.63(0.53-0.74)     | -                   |

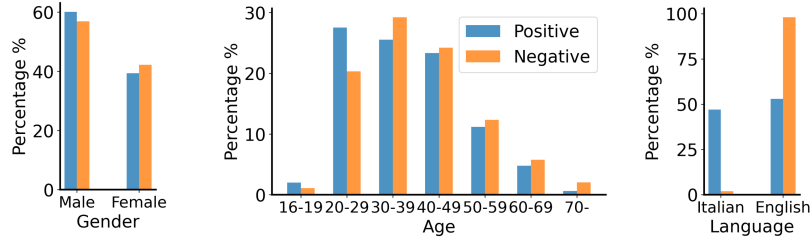

**Supplementary Figure 5. Overall Demographic distribution for language bias evaluation.**

**Supplementary Table 6. Performance of subgroups based on the model trained with Language Bias.**

| Modality         | # Pos./Neg.       | AUC(95% CI)     | Sensitivity(95% CI) | Specificity(95% CI) |
|------------------|-------------------|-----------------|---------------------|---------------------|
| <b>Three</b>     |                   |                 |                     |                     |
| Total            | 100(139)/100(183) | 0.77(0.71-0.82) | 0.60(0.51-0.68)     | 0.78(0.72-0.84)     |
| English          | 52(73)/98(177)    | 0.61(0.54-0.69) | 0.25(0.15-0.36)     | 0.81(0.75-0.86)     |
| Italian          | 48(66)/2(6)       | 0.42(0.22-0.67) | 0.98(0.95-1.0)      | 0.00(0.00-0.00)     |
| <b>Breathing</b> |                   |                 |                     |                     |
| Total            | 100(139)/100(183) | 0.55(0.49-0.62) | 0.56(0.48-0.65)     | 0.58(0.51-0.66)     |
| English          | 52(73)/98(177)    | 0.53(0.45-0.61) | 0.51(0.39-0.63)     | 0.60(0.53-0.67)     |
| Italian          | 48(66)/2(6)       | 0.26(0.06-0.55) | 0.62(0.50-0.74)     | 0.17(0.00-0.57)     |
| <b>Cough</b>     |                   |                 |                     |                     |
| Total            | 100(139)/100(183) | 0.64(0.58-0.7)  | 0.62(0.53-0.7)      | 0.59(0.51-0.66)     |
| English          | 52(73)/98(177)    | 0.59(0.51-0.68) | 0.55(0.44-0.67)     | 0.60(0.52-0.68)     |
| Italian          | 48(66)/2(6)       | 0.57(0.27-0.81) | 0.70(0.59-0.81)     | 0.33(0.00-0.75)     |
| <b>Voice</b>     |                   |                 |                     |                     |
| Total            | 100(139)/100(183) | 0.77(0.71-0.82) | 0.59(0.50-0.67)     | 0.82(0.76-0.88)     |
| English          | 52(73)/98(177)    | 0.60(0.52-0.67) | 0.22(0.12-0.32)     | 0.85(0.79-0.90)     |
| Italian          | 48(66)/2(6)       | 0.64(0.49-0.77) | 1.00(1.00-1.00)     | 0.00(0.00-0.00)     |
